# Supplementary material
Source: MDPI journal article supplement (https://www.mdpi.com/2673-4176/3/2/26)
Supplement: s1 [file s1 › polysaccharides-1663283-supplementary.pdf]

## Supplementary Materials

Manuscript submitted to Polysaccharides

### Ionic strength of methylcellulose-based films: An alternative for modulate mechanical performance and hydrophobicity for potential food packaging application

**Table S1.** Adjusted regression equations, lack of fit values (LF), and coefficients of determination adjusted ( $R^2_{aj}$ ) for contact angle of MC-based films added with LiCl or MgCl<sub>2</sub> resulting in IS of 0, 25, 50, 250, or 500 mM.

| Treatment         | Equation <sup>a</sup>                               | LF <sup>b</sup> | $R^2_{aj}$ |
|-------------------|-----------------------------------------------------|-----------------|------------|
| MgCl <sub>2</sub> | $Y = 70.38 + 0.1471 \cdot IS - 0.000177 \cdot IS^2$ | 0.81            | 0.963      |
| LiCl              | $Y = 72.12 + 0.0239 \cdot IS$                       | 0.96            | 0.839      |

<sup>a</sup> Equations adjusted were significant ( $p < 0.05$ ) by ANOVA. <sup>b</sup> LF: p-value for lack of fit of the statistical model.

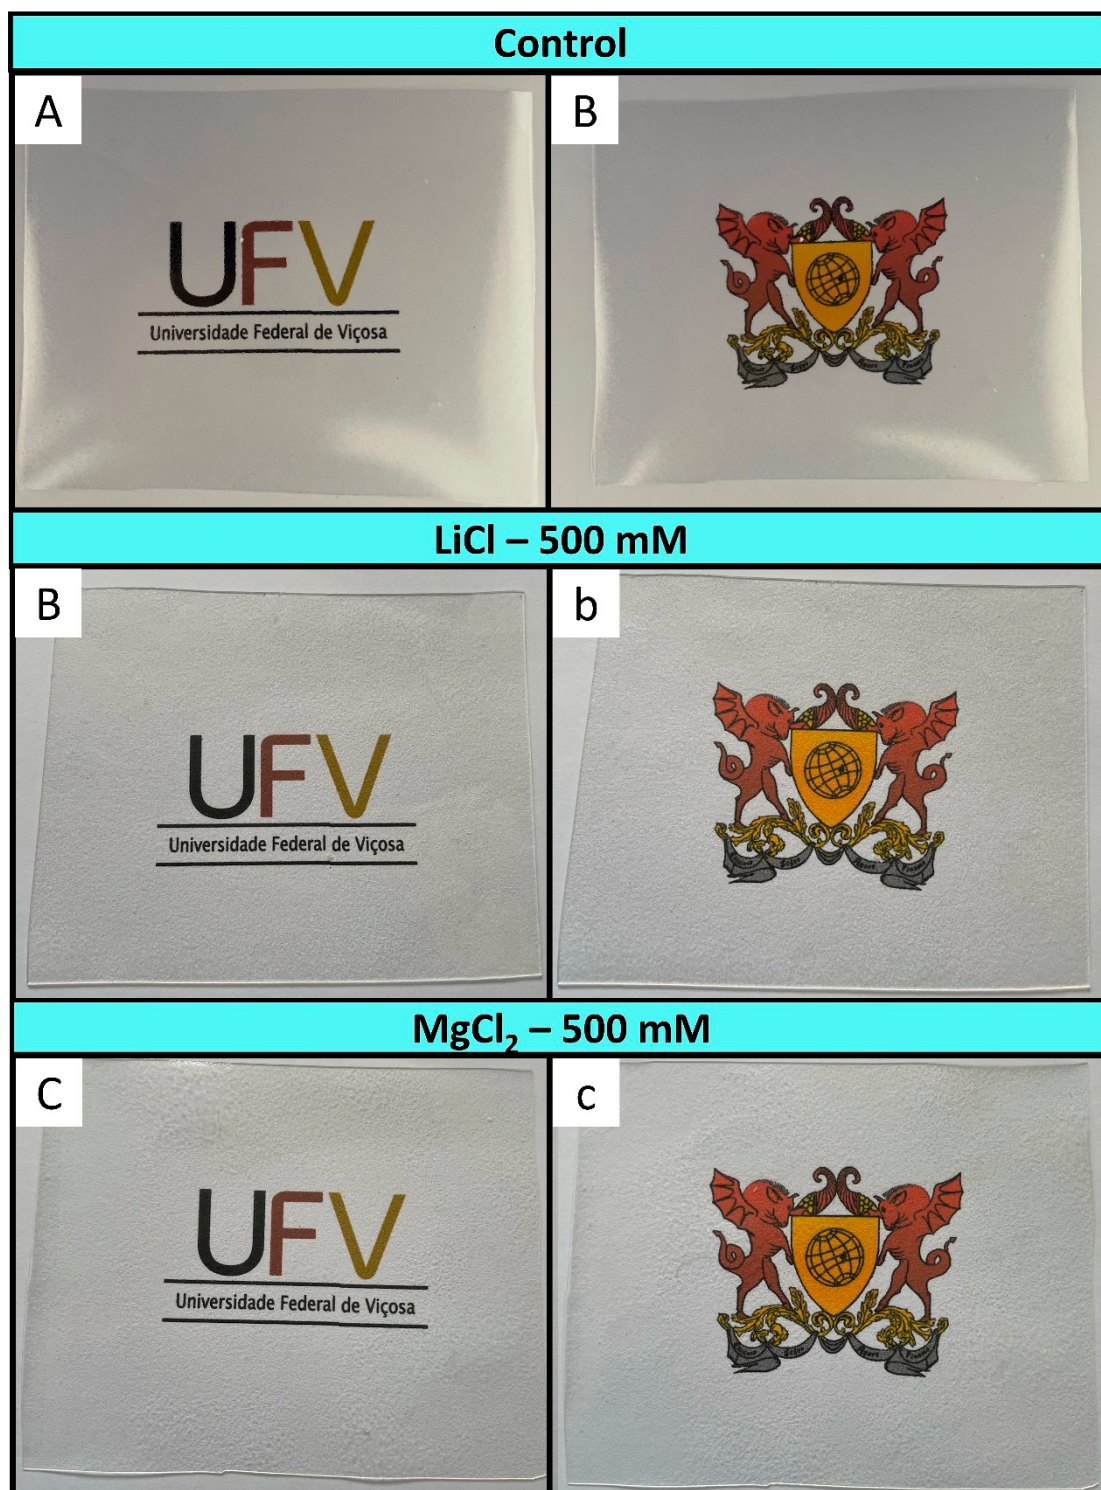

**Figure S1.** Photographs of MC-based films with IS of 0 (A, a) or 500 mM corrected for the addition of LiCl (B, b) or MgCl<sub>2</sub> (C, c).
